# Supplementary material for: A Modular Hepatitis E Virus Replicon System for Studies on the Role of ORF1-Encoded Polyprotein Domains
Source: MDPI journal article supplement (doi:10.3390/pathogens11030355), 2022-03-15
Supplement: s1 [file s1]

Table S1: List of replicon plasmids

| Name                               | Length (nt) | description                                                                                                                                                               |
|------------------------------------|-------------|---------------------------------------------------------------------------------------------------------------------------------------------------------------------------|
| <b><u>Unmodified replicons</u></b> |             |                                                                                                                                                                           |
|                                    |             |                                                                                                                                                                           |
| pMK2-p6LucA26                      | 9704        | Full-length replicon p6LucA26 in plasmid backbone pMK2; derived from JQ679013 and p6-Luc [19]                                                                             |
| pMK2-p6GAALucA26                   | 9704        | RdRp GDD->GAA mutant of full-length replicon p6LucA26 in plasmid backbone pMK2; derived from JQ679013                                                                     |
| pMK2-47832mcLucA26                 | 9697        | Full-length replicon 47832mcLucA26 in plasmid backbone pMK2; derived from MN756606                                                                                        |
| pMK2-rab52LucA26                   | 9573        | Full-length replicon rab52LucA26 in plasmid backbone pMK2; derived from KY436898                                                                                          |
| pMK2-rab81LucA26                   | 9500        | Full-length replicon rab81LucA26 in plasmid backbone pMK2; derived from MT920909                                                                                          |
| <b><u>MYP chimeras</u></b>         |             |                                                                                                                                                                           |
| pMK2-p6(MYP.47832mc)LucA26         | 9703        | Chimeric replicon p6(MYP.47832mc)LucA26 in plasmid backbone pMK2; p6LucA26 backbone with nt 1-2139 replaced by the homologous fragment (nt 1-2138) of 47832mcLucA26       |
| pMK2-p6(MYP.rab52)LucA26           | 9705        | Chimeric replicon p6(MYP.rab52)LucA26 in plasmid backbone pMK2; p6LucA26 backbone with nt 1-2139 replaced by the homologous fragment (nt 1-2140) of rab52LucA26           |
| pMK2-p6(MYP.rab81)LucA26           | 9705        | Chimeric replicon p6(MYP.rab81)LucA26 in plasmid backbone pMK2; p6LucA26 backbone with nt 1-2139 replaced by the homologous fragment (nt 1-2140) of rab81LucA26           |
| <b><u>VXH chimeras</u></b>         |             |                                                                                                                                                                           |
| pMK2-p6(VXH.47832mc)LucA26         | 9704        | Chimeric replicon p6(VXH.47832mc)LucA26 in plasmid backbone pMK2; p6LucA26 backbone with nt 2144-4059 replaced by the homologous fragment (nt 2143-4058) of 47832mcLucA26 |
| pMK2-p6(VXH.rab52)LucA26           | 9575        | Chimeric replicon p6(VXH.rab52)LucA26 in plasmid backbone pMK2; p6LucA26 backbone with nt 2144-4059 replaced by the homologous fragment (nt 2145-3931) of rab52LucA26     |
| pMK2-p6(VXH.rab81)LucA26           | 9509        | Chimeric replicon p6(VXH.rab81)LucA26 in plasmid backbone pMK2; p6LucA26 backbone with nt 2144-4059 replaced by the homologous fragment (nt 2145-3865) of rab81LucA26     |
| <b><u>RJ chimeras</u></b>          |             |                                                                                                                                                                           |
| pMK2-p6(RJ.47832mc)LucA26          | 9704        | Chimeric replicon p6(RJ.47832mc)LucA26 in plasmid backbone pMK2; p6LucA26 backbone with nt 4064-5347 replaced by the homologous fragment (nt 4063-5346) of 47832mcLucA26  |
| pMK2-p6(RJ.rab52)LucA26            | 9704        | Chimeric replicon p6(RJ.rab52)LucA26 in plasmid backbone pMK2; p6LucA26 backbone with nt 4064-5347 replaced by the homologous fragment (nt 3936-5219) of rab52LucA26      |
| pMK2-p6(RJ.rab81)LucA26            | 9704        | Chimeric replicon p6(RJ.rab81)LucA26 in plasmid backbone pMK2; p6LucA26 backbone with nt 4064-5347 replaced by the homologous fragment (nt 3870-5153) of rab81LucA26      |

Table S2: Sequences of cloning and sequencing primers.

| Name      | Sequence (5' -> 3')                 | Source    | Used in                            |
|-----------|-------------------------------------|-----------|------------------------------------|
| 32c_3af   | AGTCGAAGACATGGTCAACATCTGGTTTTCTAG   | this work | Cloning of VXH.47832mc             |
| 32c_3ar   | CAGTGAAGACTTGACCATGTCCGGGTGTAC      | this work | Cloning of MYP.47832mc             |
| 32c_4f    | AGTCGAAGACTATGCCTCAGGAGCTTACG       | this work | Cloning of RJ.47832mc              |
| 32c_4r    | AGTCGAAGACGAGGCATATATAACAAGCCCTG    | this work | Cloning of VXH.47832mc             |
| 32c_5r    | AGTCGAAGACTCCCATGGGCAATGCACAA       | this work | Cloning of RJ.47832mc              |
| 32c_6f    | AGTCGAAGACCTGATGTTAGGATTCTAGTTCAAC  | this work | Cloning of terA26.47832mc          |
| 52_3f     | AGTCGAAGACTTGGTCCACGTCTGG           | this work | Cloning of VXH.rab52               |
| 52_3r     | AGTCCGTCTCGGACCAAGTTTTAGTATAAAGAGTC | this work | Cloning of MYP.rab52               |
| 52_4f     | AGTCGAAGACTATGCCGCAGGAGCTTAC        | this work | Cloning of RJ.rab52                |
| 52_4r     | AGTCGAAGACTCGGCATATACAGGAGACCC      | this work | Cloning of VXH.rab52               |
| 52_5r     | AGTCGAAGACTCCCATGGGCAATGCAG         | this work | Cloning of RJ.rab52                |
| 52_6f     | AGTCGAAGACTCGATGTCAGGATCCTTGTTTC    | this work | Cloning of ter.rab52               |
| 52fw_bHel | CCAGATTAGTGCCTACCACC                | this work | sequencing                         |
| 52fw_Hel  | TGCTGGCTGTACCGTTAACC                | this work | sequencing                         |
| 52fw_HVR  | GTCCAGCTGCCACCTTCTG                 | this work | sequencing                         |
| 52fw_MT   | ACCTACCACACTACCTTTAC                | this work | sequencing                         |
| 52fw_ORF2 | ATACCTCATGACATCGATCTTG              | this work | sequencing                         |
| 52fw_PCP  | GTGAAGAGTGTGACCAAGAAG               | this work | sequencing                         |
| 52fw_Rdrp | GTTATATCATCTGGTCCGGTC               | this work | sequencing                         |
| 52rv_ORF2 | GTCTGATCGTACTCAGCAGC                | this work | sequencing                         |
| 52s_3f    | ACTTGGTCCACGTCTGG                   | this work | sequencing                         |
| 52s_4f    | TATGCCGCAGGAGCTTAC                  | this work | sequencing                         |
| 52s_4r    | CGGCATATACAGGAGACCC                 | this work | sequencing                         |
| 52s_5r    | TCCCATGGGCAATGCAG                   | this work | sequencing                         |
| 81.3'250  | ACTGTTGACCACCCTGCACG                | this work | sequencing                         |
| 81_3f2    | AGTCGAAGACTTGGTCAACATCTGGTT         | this work | Cloning of VXH.rab81               |
| 81_3r     | AGTCGAAGACTTGACCAAGTCCGAGTATACAAG   | this work | Cloning of MYP.rab81               |
| 81_4f     | AGTCCGTCTCATGCCGCAGGAGCTTAC         | this work | Cloning of RJ.rab81                |
| 81_4r     | AGTCGAAGACGCGGCATGTAAAGCAACC        | this work | Cloning of VXH.rab81               |
| 81_5r     | AGTCCGTCTCCCATGGGCAATGCACAG         | this work | Sequencing;<br>Cloning of RJ.rab81 |

Table S2 (continued)

| Name                               | Sequence (5' -> 3')                          | Source    | Used in                                                   |
|------------------------------------|----------------------------------------------|-----------|-----------------------------------------------------------|
| 81_6f                              | AGTCGAAGACCTGATGTCAGGATTCTGGTC               | this work | Cloning of ter.rab81                                      |
| AmpRp_rv                           | CTGAGAAGACCATACTCTTCCTTTTCAATATTATTGAAGC     | this work | Sequencing<br>Cloning of pMK2                             |
| BbsI_T(26)CC                       | GAAGACGCTTTTTTTTTTTTTTTTTTTTTTCC             | this work | Cloning of terA26.rab52<br>terA26.rab81<br>terA26.47832mc |
| BbsI_T7p                           | GAAGACTTCTGCTAATACGACTCACTATA                | this work | Cloning of MYP.rab81<br>MYP.47832mc                       |
| Cloning of Analysis Forward Primer | ACCTGCCAACCAAAGCGAGAAC                       | NEB       | sequencing                                                |
| Cloning of Analysis Reverse Primer | TCAGGGTTATTGTCTCATGAGCG                      | NEB       | sequencing                                                |
| Esp3I_T(26)CC                      | CGTCTCGTTTTTTTTTTTTTTTTTTTTTCC               | this work | Cloning of GLuc_terA26.p6                                 |
| Esp3I_T7p                          | CGTCTCGCTGCTAATACGACTCACTATA                 | this work | Cloning of MYP.p6<br>MYP.rab52                            |
| F1610                              | CTTGAGGCCCTTTATAGTGC                         | [29]      | sequencing                                                |
| F2991c                             | CTATTCAACAGGGTGACGTTG                        | this work | sequencing                                                |
| F5086                              | GGACCTTACAAATCTATTATACAG                     | [29]      | sequencing                                                |
| F6485                              | CGACAATCAACATGAACAGGAC                       | [29]      | sequencing                                                |
| F705                               | GTGCAGGGTATAACCATGATG                        | [29]      | sequencing                                                |
| GLuc_fw_Kp6_O2                     | CTGACGCTCTCCATGGGATCACCATGGGAGTCAAAGTTCTGTTG | this work | Cloning of GLuc-terA26.p6                                 |
| K2_rv                              | CCTTGATTACGGTAGTGGAG                         | this work | sequencing                                                |
| KanR_fw                            | CTGAGAAGACAGAGTATGATTGAACAAGATGGATTGC        | this work | Cloning of pMK2                                           |
| KanR_rv                            | CTGAGAAGACAGAGTCAGAAGAACTCGTCAAGAAG          | this work | Cloning of pMK2                                           |
| Kp6/GAA_fw                         | CTGACGCTCTCGCAGCTTCGGTGGTCTCTGTAGCG          | this work | Cloning of RJ_GAA.p6                                      |
| Kp6/GAA_rv                         | CTGACGCTCTCAGCTGCACCCTTAAAGGCAGCAACAC        | this work | Cloning of RJ_GAA.p6                                      |
| Kp6_3af                            | CAGTCGCTCTGGTCAACATCTGGCTTTTC                | this work | Cloning of VXH.p6                                         |
| Kp6_3ar                            | CAGTCGCTCTGACCAGGTCCGGGTATAC                 | this work | Cloning of MYP.p6                                         |
| Kp6_4f                             | CAGTCGCTCTATGCCACAAGAGCTTACCGTG              | this work | Cloning of RJ.p6                                          |
| Kp6_4r                             | CAGTCGCTCTGGCATGTAAAGCAGGCCCTG               | this work | Cloning of MYP.p6                                         |
| Kp6_5r                             | CAGTCGCTCTCCCATGGGCGATGCAACAAAC              | this work | Cloning of RJ.p6                                          |

Table S2 (continued)

| Name        | Sequence (5' -> 3')                             | Source    | Used in         |
|-------------|-------------------------------------------------|-----------|-----------------|
| Ori_fw      | CTGAGA <u>AAGAC</u> GAGACTGTCAGACCAAGTTTACTC    | this work | Cloning of pMK2 |
| p15A_seq_rv | GAGTCAGTGAGCGAGGAAG                             | this work | sequencing      |
| p6_F1750    | GGACGACGGTGGTTGA                                | this work | sequencing      |
| p6_F2700    | AGACTGTGATTGGCTGG                               | this work | sequencing      |
| p6_F3250    | GATGTTGATGTGGTGGTTG                             | this work | sequencing      |
| p6_F4000    | TCCTGCCAGATTAGTGC                               | this work | sequencing      |
| p6_F4900    | GGTCCTCTGTAGCGAC                                | this work | sequencing      |
| p6_F600     | TTGTATGCGCACTACATCT                             | this work | sequencing      |
| p6_F6750    | CCAATGGCGAGCCGAC                                | this work | sequencing      |
| p6_R1900    | ATGTAGCAGTGCAATCCAG                             | this work | sequencing      |
| p6_R2900    | TGGTATATGCCCGAGCC                               | this work | sequencing      |
| p6_R4300    | CTCCACCATGGCCTCAA                               | this work | sequencing      |
| p6_R5300    | CCAATAAGGTTATGTACCAG                            | this work | sequencing      |
| p6_R6100    | ATGRAGGCGCTCACTAG                               | this work | sequencing      |
| p6_R6800    | TCGTACTCAGCGGCAGT                               | this work | sequencing      |
| pACYC_Seq   | AATAGGCGTATCACGAGGC                             | this work | sequencing      |
| pMK2_fw     | CGGGATCCGAAGACTGAAAATTTAAATACGAAAGGGCCTCGTGATAC | this work | Cloning of pMK2 |
| pMK2_rv     | CGGGATCCGAAGACAGGCAGTCCTAGCGGAGTGTATACTGG       | this work | Cloning of pMK2 |
| Primer_2F   | GACTACTATTATTGCTACGGC                           | [29]      | sequencing      |
| Primer_3F   | GAGATGATTCAATGGTCTTATG                          | [29]      | sequencing      |
| Primer_4R   | CACATAAAATGTTTTAGAATGC                          | [29]      | sequencing      |
| R2429       | CACAATCCGACTCGAATAAGG                           | [29]      | sequencing      |
| R3157       | CAGCAAATGCGGTGGTAATGAC                          | [29]      | sequencing      |
| R5625       | CATACAAGACAAGATTAGTGCC                          | [29]      | sequencing      |

Underlined nucleotides represent the recognition sites of the restriction endonucleases used for cloning.

Table S3: List of Cloning of intermediates

| Name                                                                                                                            | Length (nt) | description                                                                                                                                                                               |
|---------------------------------------------------------------------------------------------------------------------------------|-------------|-------------------------------------------------------------------------------------------------------------------------------------------------------------------------------------------|
| <b><u>MYP Fragments</u></b>                                                                                                     |             |                                                                                                                                                                                           |
| pMiniT2.0-T7pMYP.47832mc                                                                                                        | 4771        | subgenomic fragment MYP.47832mc with T7 promoter in pMiniT2.0                                                                                                                             |
| pMiniT2.0-T7pMYP.rab52                                                                                                          | 4771        | subgenomic fragment MYP.rab52 with T7 promoter in pMiniT2.0                                                                                                                               |
| pMiniT2.0-T7pMYP.rab81                                                                                                          | 4773        | subgenomic fragment MYP.rab81 with T7 promoter in pMiniT2.0                                                                                                                               |
| pMiniT2.0-T7pMYP.p6                                                                                                             | 4770        | subgenomic fragment MYP.p6 with T7 promoter in pMiniT2.0                                                                                                                                  |
| <b><u>VXH Fragments</u></b>                                                                                                     |             |                                                                                                                                                                                           |
| pMiniT2.0-VXH.47832mc                                                                                                           | 4536        | subgenomic fragment VXH.47832mc in pMiniT2.0                                                                                                                                              |
| pMiniT2.0-VXH.rab52                                                                                                             | 4407        | subgenomic fragment VXH.rab52 in pMiniT2.0                                                                                                                                                |
| pMiniT2.0-VXH.rab81                                                                                                             | 4341        | subgenomic fragment VXH.rab81 in pMiniT2.0                                                                                                                                                |
| pMiniT2.0-VXH.p6                                                                                                                | 4534        | subgenomic fragment VXH.p6 in pMiniT2.0                                                                                                                                                   |
| <b><u>RJ Fragments</u></b>                                                                                                      |             |                                                                                                                                                                                           |
| pMiniT2.0-RJ.47832mc                                                                                                            | 3904        | subgenomic fragment RJ.47832mc in pMiniT2.0                                                                                                                                               |
| pMiniT2.0-RJ.rab52                                                                                                              | 3904        | subgenomic fragment RJ.rab52 in pMiniT2.0                                                                                                                                                 |
| pMiniT2.0-RJ.rab81                                                                                                              | 3902        | subgenomic fragment RJ.rab81 in pMiniT2.0                                                                                                                                                 |
| pMiniT2.0-RJ.p6                                                                                                                 | 3902        | subgenomic fragment RJ.p6 in pMiniT2.0                                                                                                                                                    |
| pMiniT2.0-RJ_GAA.p6                                                                                                             | 3902        | subgenomic fragment RJ_GAA.p6 in pMiniT2.0; contains RdRp GDD->GAA codon exchanges                                                                                                        |
| <b><u>Gaussia Luciferase reporter and terminal fragment of p6LucA26</u></b>                                                     |             |                                                                                                                                                                                           |
| pMiniT2.0-insGLuc-terA26.p6                                                                                                     | 4881        | subgenomic fragment insGLuc-terA26.p6 in pMiniT2.0                                                                                                                                        |
| <b><u>3' Terminal fragments</u></b> of 47832mc, rab52, rab81, for combination with <i>Gaussia</i> luciferase reporter fragments |             |                                                                                                                                                                                           |
| pMiniT2.0-terA26.47832mc                                                                                                        | 3995        | subgenomic fragment terA26.47832mc in pMiniT2.0                                                                                                                                           |
| pMiniT2.0-terA26.rab52                                                                                                          | 3998        | subgenomic fragment terA26.rab52mc in pMiniT2.0                                                                                                                                           |
| pMiniT2.0-terA26.rab81                                                                                                          | 3991        | subgenomic fragment terA26.rab81 in pMiniT2.0                                                                                                                                             |
| <b><u>Gaussia Luciferase reporter fragments</u></b> for combination with corresponding _terA26 of 47832mc, rab52, rab81         |             |                                                                                                                                                                                           |
| 32cLuc_GL1 in pTwist Amp High Copy                                                                                              | 3121        | contains 11nt upstream of the ORF2 start codon, a <i>Gaussia</i> luciferase reporter inserted at the ORF2 start codon (deleting 377nt of the HEV genome), and 317nt of the 47832mc genome |
| 52Luc_GL1 in pTwist Amp High Copy                                                                                               | 3121        | contains 11nt upstream of the ORF2 start codon, a <i>Gaussia</i> luciferase reporter inserted at the ORF2 start codon (deleting 377nt of the HEV genome), and 317nt of the rab52 genome   |
| 81Luc_GL1 in pTwist Amp High Copy                                                                                               | 3121        | contains 11nt upstream of the ORF2 start codon, a <i>Gaussia</i> luciferase reporter inserted at the ORF2 start codon (deleting 380nt of the HEV genome), and 317nt of the rab81 genome   |
| <b><u>Cloning of backbone plasmid for replicon constructs</u></b>                                                               |             |                                                                                                                                                                                           |
| pMK2                                                                                                                            | 2101        | Cloning of vector pMK2; Kanamycin resistance gene, pBR322-derived origin of replication                                                                                                   |

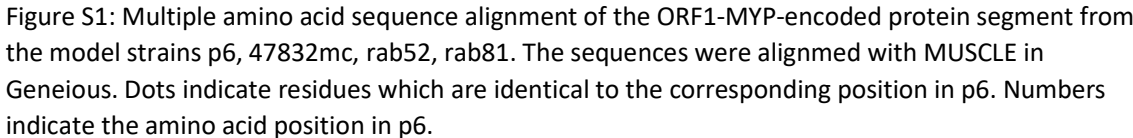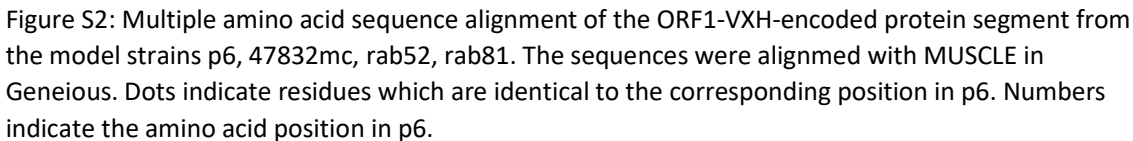

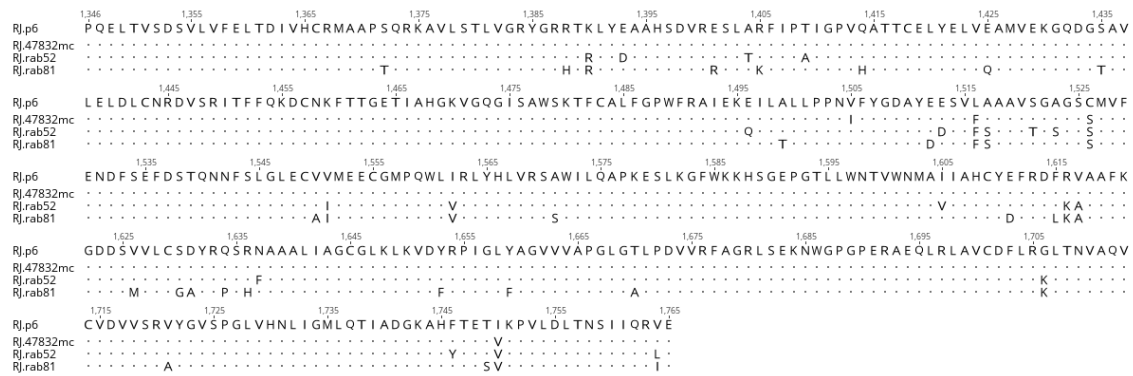

Figure S3: Multiple amino acid sequence alignment of the ORF1-RJ-encoded protein segment from the model strains p6, 47832mc, rab52, rab81. The sequences were aligned with MUSCLE in Geneious. Dots indicate residues which are identical to the corresponding position in p6. Numbers indicate the amino acid position in p6 [19,29].

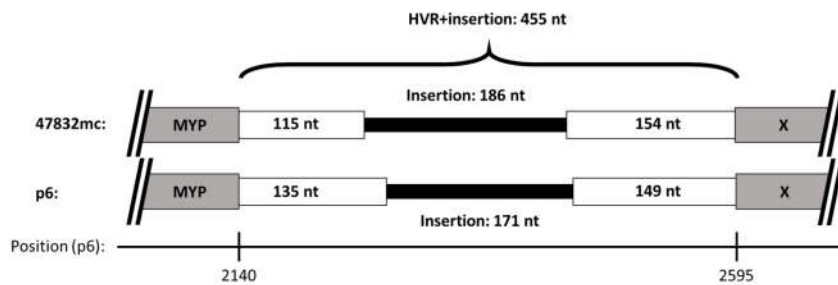

Figure S4: Comparison of the HVR insertions of p6 and 47832mc. While the insertion of p6 is shorter than the insertion within the HVR of 47832mc by 15 nucleotides, remainder of the p6 HVR is longer by the same amount. As a consequence, the total lengths of both HVRs are identical [19,29].
